# Supplementary material
Source: PubMed Central journal article supplement (PMC4059083)
Supplement: NIHMS568523-supplement-Supplement.pdf [file NIHMS568523-supplement-Supplement.pdf]

## Supplementary materials for multiple imputation in quantile regression

BY YING WEI

*Department of Biostatistics, Columbia University, 722 West 168th St., New York, NY 10032*  
ying.wei@columbia.edu

YANYUAN MA AND RAYMOND J. CARROLL

*Department of Statistics, Texas A&M University, TAMU 3143, College Station, TX 77843-3143*  
ma@stat.tamu.edu carroll@stat.tamu.edu

We present the supplementary simulation results in the following settings:

Setting 1: Observation  $(Y, X, Z)$  follows Models (4) and (5) in the section of Simulation respectively. The  $(X, Z)$  correlation is 0.5. A heavier missing rate is introduced, i.e., 35%  $X$ s are missing. The estimated coefficients and their standard errors from the “complete-data-estimator”, multiple imputation estimator and shrinkage estimator are presented in Table 1.

Setting 2: Observation  $(Y, X, Z)$  follows Models (4) and (5), with 25%  $x$  missing. A weaker  $(X, Z)$  correlation is used, i.e.,  $(X, Z)$  correlation is 0.3. The estimated coefficients and their standard errors from complete-data-estimator, multiple imputation estimator and shrinkage estimator are presented in Table 2.

Setting 3: Observation  $(Y, X, Z)$  follows Models (4) and (5), with 25%  $x$  missing. A stronger  $(X, Z)$  correlation is used, i.e.,  $(X, Z)$  correlation is 0.7. The estimated coefficients and their standard errors from complete-data-estimator, multiple imputation estimator and shrinkage estimator are presented in Table 3.

|     |           |                     | $\tau = 0.1$ |       |      | $\tau = 0.5$ |      |      | $\tau = 0.9$ |      |      |
|-----|-----------|---------------------|--------------|-------|------|--------------|------|------|--------------|------|------|
|     |           |                     | True         | Mean  | S.E. | True         | Mean | S.E. | True         | Mean | S.E. |
| M   | intercept | $\hat{\beta}$       | -0.28        | -0.33 | 0.88 | 1.00         | 0.98 | 0.71 | 2.28         | 2.22 | 0.96 |
|     |           | $\tilde{\beta}$     | -0.28        | -0.13 | 0.71 | 1.00         | 1.13 | 0.55 | 2.28         | 2.48 | 0.81 |
|     |           | $\hat{\beta}^{(s)}$ | -0.28        | -0.33 | 0.75 | 1.00         | 1.03 | 0.62 | 2.28         | 2.36 | 0.83 |
| D   | x         | $\hat{\beta}$       | 1.00         | 0.99  | 0.16 | 1.00         | 1.00 | 0.12 | 1.00         | 1.00 | 0.16 |
|     |           | $\tilde{\beta}$     | 1.00         | 1.00  | 0.17 | 1.00         | 1.00 | 0.14 | 1.00         | 1.01 | 0.16 |
|     |           | $\hat{\beta}^{(s)}$ | 1.00         | 0.91  | 0.18 | 1.00         | 0.93 | 0.15 | 1.00         | 0.90 | 0.19 |
| (4) | z         | $\hat{\beta}$       | 1.00         | 1.01  | 0.20 | 1.00         | 1.00 | 0.15 | 1.00         | 1.00 | 0.21 |
|     |           | $\tilde{\beta}$     | 1.00         | 1.05  | 0.17 | 1.00         | 1.04 | 0.12 | 1.00         | 1.03 | 0.17 |
|     |           | $\hat{\beta}^{(s)}$ | 1.00         | 1.03  | 0.18 | 1.00         | 1.02 | 0.13 | 1.00         | 1.02 | 0.19 |
| M   | intercept | $\hat{\beta}$       | 1.00         | 0.79  | 3.88 | 1.00         | 0.99 | 2.69 | 1.00         | 0.72 | 4.07 |
|     |           | $\tilde{\beta}$     | 1.00         | 1.10  | 2.20 | 1.00         | 1.11 | 1.79 | 1.00         | 1.74 | 2.25 |
|     |           | $\hat{\beta}^{(s)}$ | 1.00         | 0.85  | 3.16 | 1.00         | 1.03 | 2.24 | 1.00         | 1.34 | 3.25 |
| D   | x         | $\hat{\beta}$       | 0.36         | 0.37  | 0.82 | 1.00         | 1.01 | 0.55 | 1.64         | 1.68 | 0.69 |
|     |           | $\tilde{\beta}$     | 0.36         | 0.34  | 0.64 | 1.00         | 0.85 | 0.49 | 1.64         | 1.34 | 0.60 |
|     |           | $\hat{\beta}^{(s)}$ | 0.36         | 0.37  | 0.76 | 1.00         | 0.98 | 0.53 | 1.64         | 1.58 | 0.67 |
| (5) | z         | $\hat{\beta}$       | 0.36         | 0.41  | 0.87 | 1.00         | 1.00 | 0.59 | 1.64         | 1.67 | 1.03 |
|     |           | $\tilde{\beta}$     | 0.36         | 0.37  | 0.54 | 1.00         | 1.11 | 0.38 | 1.64         | 1.70 | 0.60 |
|     |           | $\hat{\beta}^{(s)}$ | 0.36         | 0.41  | 0.70 | 1.00         | 1.02 | 0.49 | 1.64         | 1.67 | 0.85 |

Table 1. Means and standard errors of the estimated coefficients at quantile levels 0.1, 0.5 and 0.9 from 500 simulations in Models (4) and (5), with  $X$  missing 35% of the time. Here  $\hat{\beta}$  stands for the estimated coefficients using the completely observed data only,  $\tilde{\beta}$  is multiple imputation estimator with 10 imputations; and  $\hat{\beta}^{(s)}$  is the shrinkage estimator. The true coefficients are listed under the "True" columns.

|     |           |                     | $\tau = 0.1$ |       |      | $\tau = 0.5$ |      |      | $\tau = 0.9$ |      |      |
|-----|-----------|---------------------|--------------|-------|------|--------------|------|------|--------------|------|------|
|     |           |                     | True         | Mean  | S.E. | True         | Mean | S.E. | True         | Mean | S.E. |
| M   | intercept | $\hat{\beta}$       | -0.28        | -0.31 | 0.89 | 1.00         | 1.01 | 0.62 | 2.28         | 2.17 | 0.84 |
|     |           | $\tilde{\beta}$     | -0.28        | -0.14 | 0.71 | 1.00         | 1.04 | 0.54 | 2.28         | 2.70 | 0.73 |
|     |           | $\hat{\beta}^{(s)}$ | -0.28        | -0.28 | 0.25 | 1.00         | 1.02 | 0.56 | 2.28         | 2.32 | 0.82 |
| D   | x         | $\hat{\beta}$       | 1.00         | 0.99  | 0.16 | 1.00         | 0.99 | 0.11 | 1.00         | 1.00 | 0.14 |
|     |           | $\tilde{\beta}$     | 1.00         | 0.93  | 0.14 | 1.00         | 0.96 | 0.11 | 1.00         | 0.96 | 0.16 |
|     |           | $\hat{\beta}^{(s)}$ | 1.00         | 0.98  | 0.15 | 1.00         | 0.99 | 0.11 | 1.00         | 0.99 | 0.15 |
| (4) | z         | $\hat{\beta}$       | 1.00         | 1.01  | 0.17 | 1.00         | 1.00 | 0.12 | 1.00         | 1.02 | 0.18 |
|     |           | $\tilde{\beta}$     | 1.00         | 1.02  | 0.14 | 1.00         | 1.01 | 0.10 | 1.00         | 0.98 | 0.16 |
|     |           | $\hat{\beta}^{(s)}$ | 1.00         | 1.02  | 0.15 | 1.00         | 1.01 | 0.10 | 1.00         | 1.00 | 0.17 |
| M   | intercept | $\hat{\beta}$       | 1.00         | 0.96  | 3.73 | 1.00         | 1.12 | 2.33 | 1.00         | 0.87 | 4.02 |
|     |           | $\tilde{\beta}$     | 1.00         | 1.06  | 2.41 | 1.00         | 1.01 | 1.69 | 1.00         | 1.55 | 2.53 |
|     |           | $\hat{\beta}^{(s)}$ | 1.00         | 0.84  | 3.20 | 1.00         | 1.08 | 1.99 | 1.00         | 1.21 | 3.44 |
| D   | x         | $\hat{\beta}$       | 0.36         | 0.43  | 0.62 | 1.00         | 1.01 | 0.51 | 1.64         | 1.68 | 0.62 |
|     |           | $\tilde{\beta}$     | 0.36         | 0.39  | 0.52 | 1.00         | 0.92 | 0.46 | 1.64         | 1.45 | 0.53 |
|     |           | $\hat{\beta}^{(s)}$ | 0.36         | 0.42  | 0.58 | 1.00         | 0.98 | 0.49 | 1.64         | 1.62 | 0.60 |
| (5) | z         | $\hat{\beta}$       | 0.36         | 0.37  | 0.64 | 1.00         | 1.04 | 0.44 | 1.64         | 1.61 | 0.58 |
|     |           | $\tilde{\beta}$     | 0.36         | 0.33  | 0.52 | 1.00         | 0.95 | 0.41 | 1.64         | 1.45 | 0.55 |
|     |           | $\hat{\beta}^{(s)}$ | 0.36         | 0.36  | 0.61 | 1.00         | 1.01 | 0.42 | 1.64         | 1.57 | 0.56 |

Table 2. Means and standard errors of the estimated coefficients at quantile levels 0.1, 0.5 and 0.9 from 500 simulations in Models (4) and (5) with  $(x, z)$  correlation 0.3. Here  $\hat{\beta}$  stands for the estimated coefficient using the completely observed data only,  $\tilde{\beta}$  is multiple imputation estimator with 10 imputations; and  $\hat{\beta}^{(s)}$  is the shrinkage estimator. The true coefficients are listed under the "True" columns.

97  
98  
99  
100  
101  
102  
103  
104  
105  
106  
107  
108  
109  
110  
111  
112  
113  
114  
115  
116  
117  
118  
119  
120  
121  
122  
123  
124  
125  
126  
127  
128  
129  
130  
131  
132  
133  
134  
135  
136  
137  
138  
139  
140  
141  
142  
143  
144

|     |           |                     | $\tau = 0.1$ |       |      | $\tau = 0.5$ |      |      | $\tau = 0.9$ |      |      |
|-----|-----------|---------------------|--------------|-------|------|--------------|------|------|--------------|------|------|
|     |           |                     | True         | Mean  | S.E. | True         | Mean | S.E. | True         | Mean | S.E. |
| M   | intercept | $\hat{\beta}$       | -0.28        | -0.27 | 0.78 | 1.00         | 1.02 | 0.61 | 2.28         | 2.32 | 0.88 |
|     |           | $\tilde{\beta}$     | -0.28        | -0.25 | 0.61 | 1.00         | 1.10 | 0.46 | 2.28         | 2.55 | 0.69 |
|     |           | $\hat{\beta}^{(s)}$ | -0.28        | -0.27 | 0.68 | 1.00         | 1.04 | 0.53 | 2.28         | 2.40 | 0.73 |
| D   | x         | $\hat{\beta}$       | 1.00         | 0.99  | 0.20 | 1.00         | 0.98 | 0.15 | 1.00         | 0.98 | 0.19 |
|     |           | $\tilde{\beta}$     | 1.00         | 0.94  | 0.18 | 1.00         | 0.94 | 0.14 | 1.00         | 0.90 | 0.20 |
|     |           | $\hat{\beta}^{(s)}$ | 1.00         | 0.98  | 0.19 | 1.00         | 0.98 | 0.14 | 1.00         | 0.97 | 0.19 |
| (4) | z         | $\hat{\beta}$       | 1.00         | 1.01  | 0.23 | 1.00         | 1.01 | 0.17 | 1.00         | 1.00 | 0.23 |
|     |           | $\tilde{\beta}$     | 1.00         | 1.06  | 0.20 | 1.00         | 1.04 | 0.14 | 1.00         | 1.03 | 0.19 |
|     |           | $\hat{\beta}^{(s)}$ | 1.00         | 1.03  | 0.21 | 1.00         | 1.02 | 0.15 | 1.00         | 1.01 | 0.20 |
| M   | intercept | $\hat{\beta}$       | 1.00         | 0.86  | 3.49 | 1.00         | 1.09 | 2.27 | 1.00         | 0.91 | 3.66 |
|     |           | $\tilde{\beta}$     | 1.00         | 0.99  | 1.92 | 1.00         | 1.00 | 1.34 | 1.00         | 1.06 | 2.09 |
|     |           | $\hat{\beta}^{(s)}$ | 1.00         | 0.80  | 2.92 | 1.00         | 1.08 | 1.79 | 1.00         | 1.11 | 3.03 |
| D   | x         | $\hat{\beta}$       | 0.36         | 0.40  | 0.84 | 1.00         | 1.06 | 0.63 | 1.64         | 1.68 | 0.78 |
|     |           | $\tilde{\beta}$     | 0.36         | 0.33  | 0.67 | 1.00         | 0.93 | 0.57 | 1.64         | 1.47 | 0.68 |
|     |           | $\hat{\beta}^{(s)}$ | 0.36         | 0.39  | 0.80 | 1.00         | 1.03 | 0.60 | 1.64         | 1.62 | 0.75 |
| (5) | z         | $\hat{\beta}$       | 0.36         | 0.36  | 0.89 | 0.36         | 0.93 | 0.66 | 0.36         | 1.60 | 1.04 |
|     |           | $\tilde{\beta}$     | 0.36         | 0.41  | 0.62 | 0.36         | 1.06 | 0.48 | 0.36         | 1.78 | 0.71 |
|     |           | $\hat{\beta}^{(s)}$ | 0.36         | 0.40  | 0.77 | 0.36         | 0.96 | 0.58 | 0.36         | 1.63 | 0.92 |

Table 3. Means and standard errors of the estimated coefficients at quantile levels 0.1, 0.5 and 0.9 from 500 simulations in Models (4) and (5) with  $(x, z)$  correlation 0.7. Here  $\hat{\beta}$  stands for the estimated coefficient using the completely observed data only,  $\tilde{\beta}$  is multiple imputation estimator with 10 imputations; and  $\hat{\beta}^{(s)}$  is the shrinkage estimator. The true coefficients are listed under the "True" columns.

SUPPLEMENTARY PLOT FOR SECTION 5: APPLICATION TO THE EATING AT AMERICAN'S TABLES STUDY

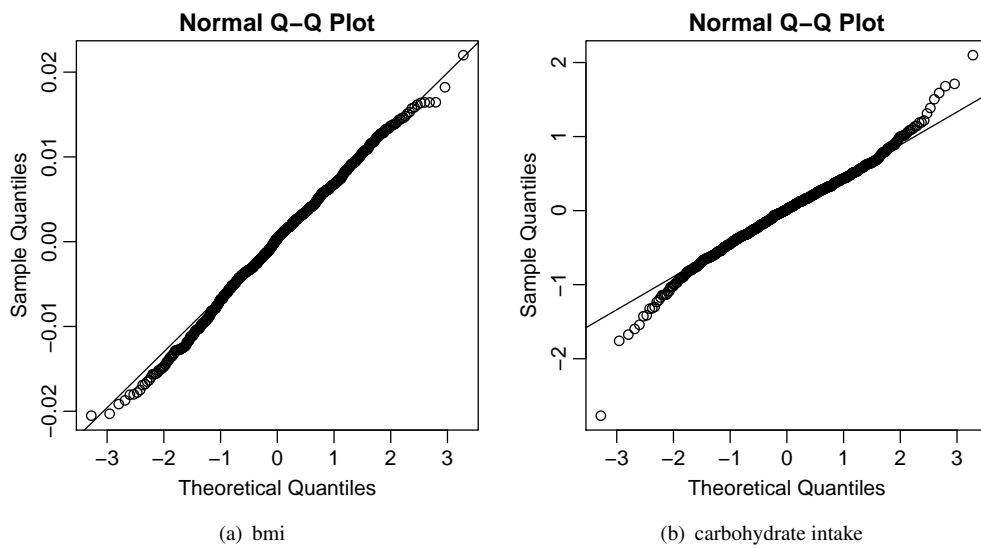

Fig. 1. Quantile-quantile plots. The left figure is quantile-quantile plot of the residuals from the model of carbohydrate intake, while the right one is that of body mass index.
